# Supplementary material for: Cellular-scale probes enable stable chronic subsecond monitoring of dopamine neurochemicals in a rodent model
Source: PubMed Central journal article supplement (PMC6135761; doi:10.1038/s42003-018-0147-y), 2018-09-12
Supplement: 42003_2018_147_MOESM3_ESM.pdf [file 42003_2018_147_MOESM3_ESM.pdf]

## **Description of Additional Supplementary Files**

**File Name:** Supplementary Data 1

**Description:** Parameters used for testing implanted  $\mu$ IPs
